# Supplementary material for: Thermal regelation of single particles and particle clusters in ice
Source: Royal Society of Chemistry journal article supplement (doi:10.1039/d0sm01547d), 2020-12-16
Supplement: d0sm01547d1.pdf [file d0sm01547d1.pdf]

Electronic Supplementary Material (ESI) for Soft Matter.  
This journal is © The Royal Society of Chemistry 2020
