# Supplementary figures and images for: Thermal regelation of single particles and particle clusters in ice
Source: Royal Society of Chemistry journal article supplement (doi:10.1039/d0sm01547d), 2020-12-16

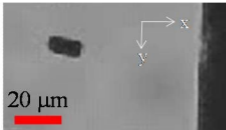

Supplement: d0sm01547d2.pdf [file d0sm01547d2.pdf]
